# Supplementary material for: Comparing the different morphotypes of a fish pathogen - implications for key virulence factors in Flavobacterium columnare
Source: PubMed Central journal article supplement (PMC4094633; doi:10.1186/1471-2180-14-170), 2014-06-26
Supplement: 1471-2180-14-170-S1.pdf [file 1471-2180-14-170-S1.pdf]

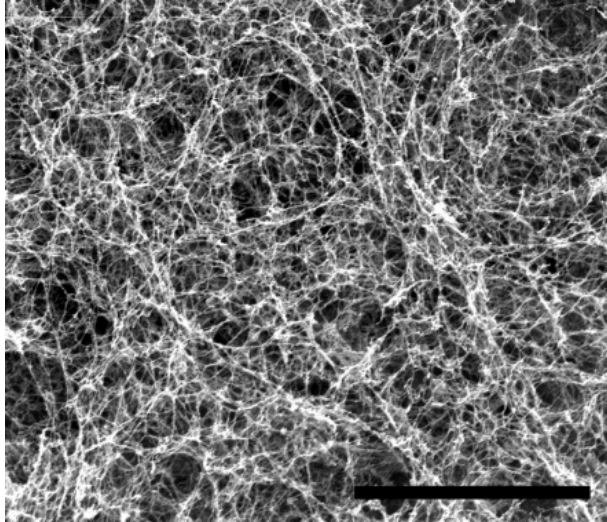

**Additional file 1 (.pdf)**

**A view of the colony surface of the Rough morphotype of *F. columnare***

Only the extracellular material was seen on the colony surface of the Rough morphotype, and cells were not observed. The scale bar was 4  $\mu\text{m}$ .
