# Supplementary material for: Comparing the different morphotypes of a fish pathogen - implications for key virulence factors in Flavobacterium columnare
Source: PubMed Central journal article supplement (PMC4094633; doi:10.1186/1471-2180-14-170), 2014-06-26
Supplement: 1471-2180-14-170-S2.pdf [file 1471-2180-14-170-S2.pdf]

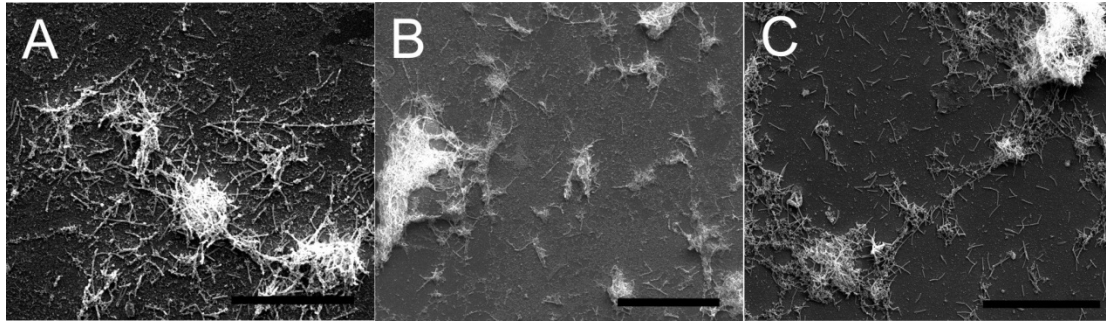

**Additional file 2 (.pdf)**

**A wider view of a typical sample of the planktonic cells from the three morphotypes visualised under HR-SEM**

Panel A: Rhizoid morphotype cells. Panel B: Rough morphotype cells. Panel C: Soft morphotype cells. The scale bar in A was 30  $\mu\text{m}$  and in B and C, 40  $\mu\text{m}$ .
