# Supplementary material for: Comparing the different morphotypes of a fish pathogen - implications for key virulence factors in Flavobacterium columnare
Source: PubMed Central journal article supplement (PMC4094633; doi:10.1186/1471-2180-14-170), 2014-06-26
Supplement: 1471-2180-14-170-S3.pdf [file 1471-2180-14-170-S3.pdf]

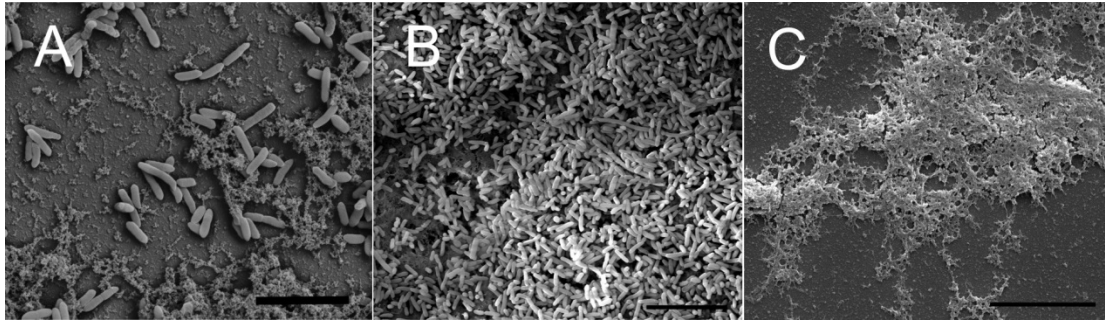

**Additional file 3 (.pdf)**

**Controls used in the HR-SEM studies**

Panel A: *E. coli* cells grown in Shieh medium. Panel B: *E. coli* cells grown on a filter paper (on Shieh agar). Panel C: Sterile Shieh medium. No vesicles, vesicle chains or filaments were seen in the controls. The scale bar in Panel A was 5  $\mu\text{m}$  and was 10  $\mu\text{m}$  in Panels B and C.
